# Supplementary material
Source: PubMed Central journal article supplement (PMC7416879)
Supplement: NIHMS1607883-supplement-Supplementary_Info_table_and_cytometry_gating_scheme.pdf [file NIHMS1607883-supplement-Supplementary_Info_table_and_cytometry_gating_scheme.pdf]

Supplementary Info Table 1 | Difference in microbiota between vivaria

| <b>Species</b> | <b>Microorganism</b>        | <b>Harvard University<sup>^</sup></b> | <b>Broad Institute<sup>^</sup></b> | <b>Fisher's exact test</b> |
|----------------|-----------------------------|---------------------------------------|------------------------------------|----------------------------|
| Virus          | Mouse norovirus             | 3/4                                   | 0/9                                | P = 0.0140                 |
| Bacteria       | <i>Helicobacter spp.</i>    | 25/25                                 | 0/9                                | P < 0.0001                 |
|                | <i>P. pneumotropica</i>     | 4/4                                   | 1/9                                | P = 0.0070                 |
|                | <i>P. aeruginosa</i>        | 4/25                                  | 0/9                                | ns                         |
|                | <i>S. aureus</i>            | 1/25                                  | 1/9                                | ns                         |
| Protozoa       | <i>Tritrichomonas muris</i> | 10/10                                 | 0/9                                | P < 0.0001                 |
|                | <i>Entamoeba muris</i>      | 1/4                                   | 0/9                                | ns                         |

<sup>^</sup>Number of mice positive / number of mice tested. Analyzed by PCR assays for rodent infectious agents (PRIA).

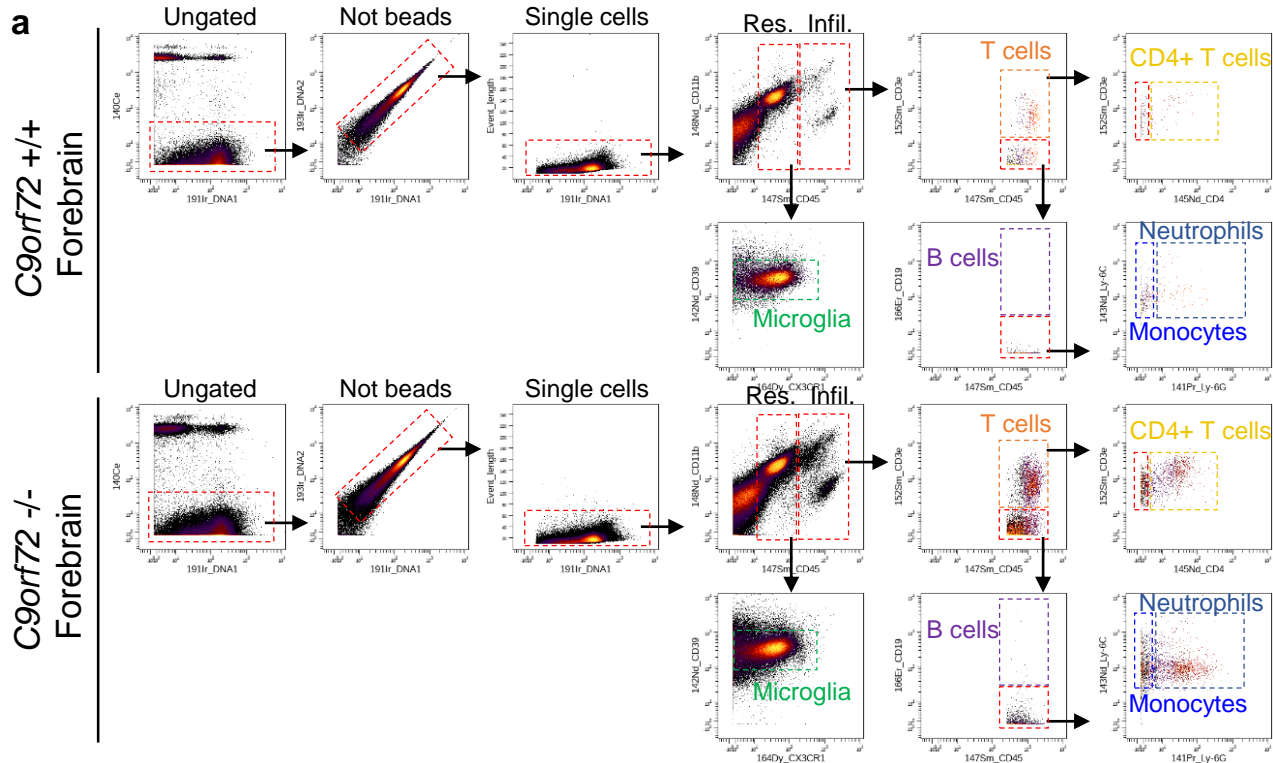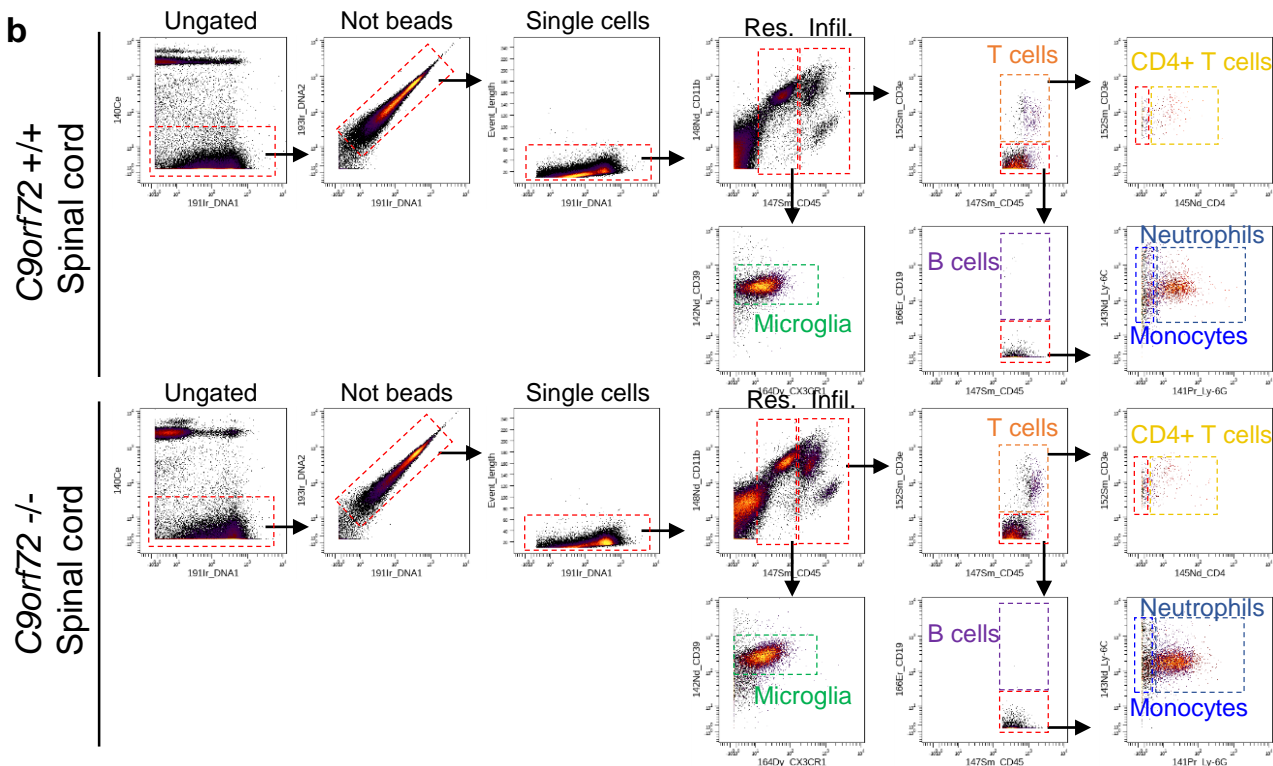

Supplementary Info mass cytometry gating scheme
