# Supplementary material
Source: PubMed Central journal article supplement (PMC7416879)

**Fig 3p**

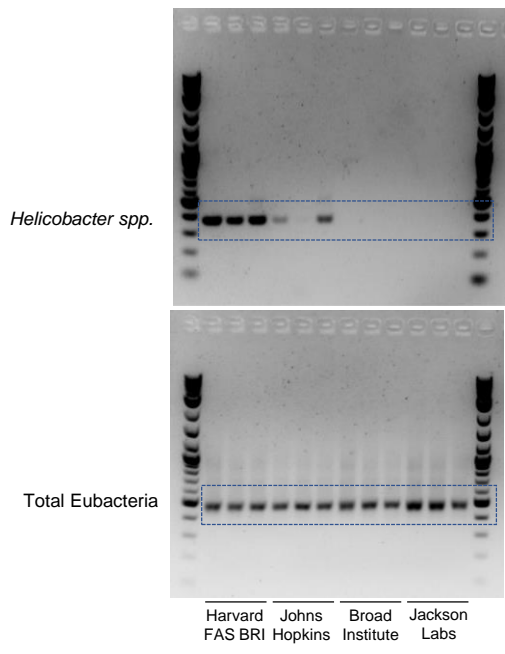

**Fig 3q**

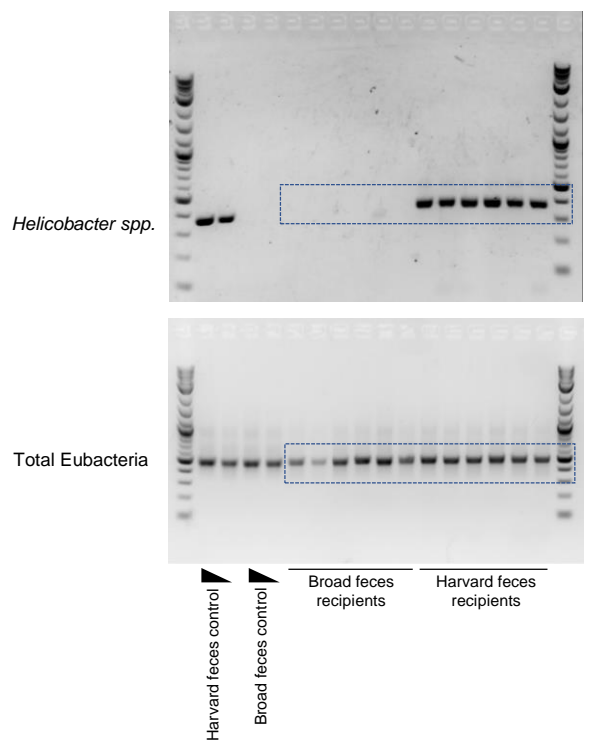

Supplement: NIHMS1607883-supplement-Supplementary_Images.pdf [file NIHMS1607883-supplement-Supplementary_Images.pdf]
